# Supplementary material
Source: Springer Nature journal article supplement (https://www.springermedizin.de/resource/supplementary/12885_2009_1803_MOESM4_ESM.pdf/9460742)

Clonogenic Fraction

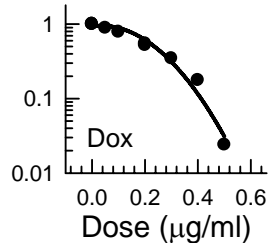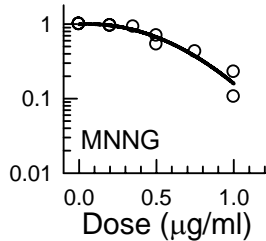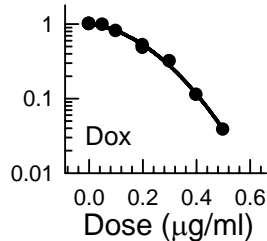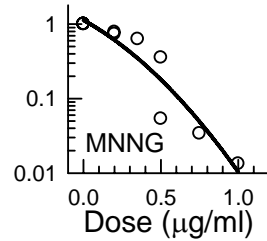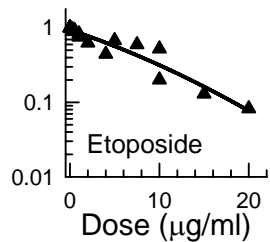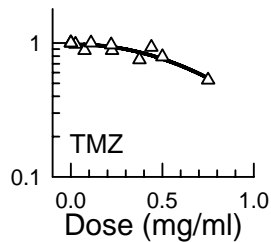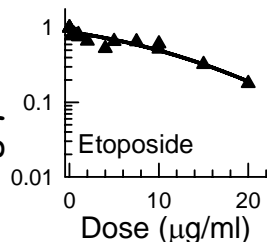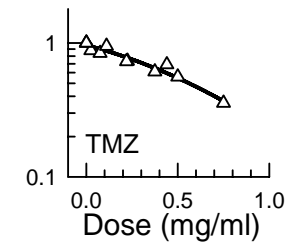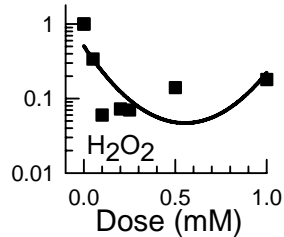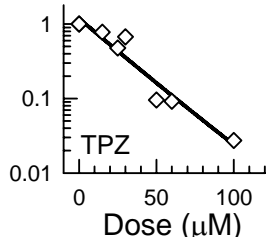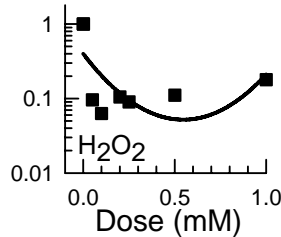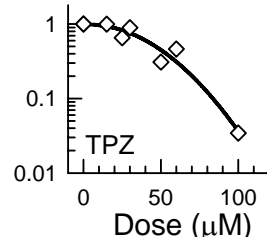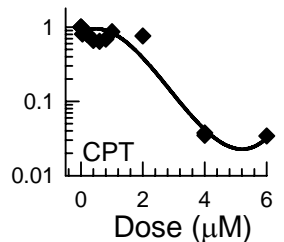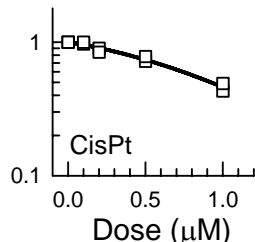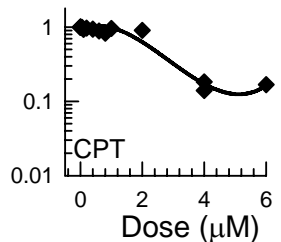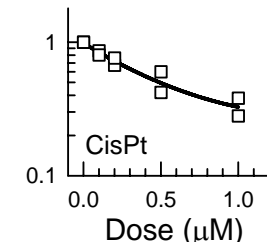

Fraction of cells lacking  $\gamma\text{H2AX}$  foci

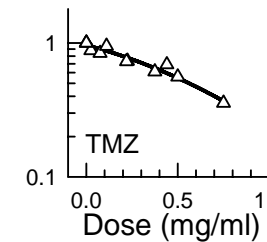

Supplement: MOESM4 [file 9460742]
